# Supplementary material
Source: publisher site journal article supplement (https://cdn.jamanetwork.com/ama/content_public/journal/derm/934990/doi150038supp2_prod.pdf)
Supplement: Supplementary file 1 [file doi150038supp2_prod.pdf]

## Supplementary Online Content

Hultgren BA, Turrisi R, Mallett KA, Ackerman S, Robinson JK. Influence of quality of relationship between patient with melanoma and partner on partner-assisted skin examination education: a randomized clinical trial. *JAMA Dermatol*. Published online September 30, 2015. doi:10.1001/jamadermatol.2015.2819.

**eTable.** Regression Coefficients for Moderator Effect of Partner Motivation and Relationship Quality on Patient Self-Efficacy

This supplementary material has been provided by the authors to give readers additional information about their work

**eTable.** Regression Coefficients for Moderator Effect of Partner Motivation and Relationship Quality on Patient Self-Efficacy

|                                       |              |      |         |
|---------------------------------------|--------------|------|---------|
| Partner Motivation                    | <sup>2</sup> | SE   | t       |
| Intervention                          | 4.71         | 1.01 | 4.37*** |
| Partner Motivation                    | 2.12         | 0.76 | 2.79**  |
| Intervention X Partner Motivation     | -1.43        | 0.88 | -1.63   |
| Agreeability with Partner             | <sup>2</sup> | SE   | t       |
| Intervention                          | 4.26         | 1.05 | 4.05*** |
| Agreeability                          | 0.55         | 0.13 | 4.36*** |
| Intervention X Agreeability           | -0.26        | 0.15 | -1.77   |
| Activities Spent With Partner         | <sup>2</sup> | SE   | t       |
| Intervention                          | 4.57         | 1.03 | 4.44*** |
| Activities                            | 1.84         | 0.38 | 4.86*** |
| Intervention X Activities             | -0.89        | 0.43 | -2.07*  |
| Happiness in Relationship             | <sup>2</sup> | SE   | t       |
| Intervention                          | 4.48         | 1.09 | 4.12*** |
| Relationship Happiness                | 6.28         | 1.8  | 3.43**  |
| Intervention X Relationship Happiness | -4.59        | 2.14 | -2.34*  |
